# Supplementary material
Source: PubMed Central journal article supplement (PMC6754604)
Supplement: pnas.1907507116.sapp.pdf [file pnas.1907507116.sapp.pdf]

## Supplementary Information for

High-performance All-Solid-State Batteries Enabled by Salt Bonding to Perovskite in Poly(ethylene oxide)

Henghui Xu<sup>a,b</sup>, Po-Hsiu Chien<sup>c,d</sup>, Jianjian Shi<sup>a,b</sup>, Yutao Li<sup>a,b,1</sup>, Nan Wu<sup>a,b</sup>, Yuanyue Liu<sup>a,b</sup>, Yan-Yan Hu<sup>c,d</sup>, and John B. Goodenough<sup>a,b,1</sup>

<sup>a</sup>Materials Science and Engineering Program, The University of Texas at Austin, Austin, TX 78712; <sup>b</sup>Texas Materials Institute, The University of Texas at Austin, Austin, TX 78712; <sup>c</sup>Department of Chemistry and Biochemistry, Florida State University, Tallahassee, FL 32306; <sup>d</sup>Center of Interdisciplinary Magnetic Resonance, National High Magnetic Field Laboratory, Tallahassee, FL 32310

Yutao Li and John B. Goodenough  
Email: [lytthu@utexas.edu](mailto:lytthu@utexas.edu); [jgoodenough@mail.utexas.edu](mailto:jgoodenough@mail.utexas.edu)

### **This PDF file includes:**

Supplementary text  
Figs. S1 to S11  
References for SI reference citations

## Supplementary Information Text

### Experimental Section

#### Preparation of perovskite $\text{Li}_{3/8}\text{Sr}_{7/16}\text{Ta}_{3/4}\text{Zr}_{1/4}\text{O}_3$

$\text{Li}_{3/8}\text{Sr}_{7/16}\text{Ta}_{3/4}\text{Zr}_{1/4}\text{O}_3$  (LSTZ) was prepared by a solid-state reaction. Stoichiometric amounts of  $\text{Li}_2\text{CO}_3$ ,  $\text{SrCO}_3$ ,  $\text{Ta}_2\text{O}_5$ , and  $\text{ZrO}_2$  were ground and heated at 900 °C for 6 h, then the collected powder was ground again, pressed into a pellet, and fired at 1300 °C for 10 h in air. The obtained  $\text{Li}_{3/8}\text{Sr}_{7/16}\text{Ta}_{3/4}\text{Zr}_{1/4}\text{O}_3$  pellet was polished for  $\text{Li}^+$  conductivity testing, and ball-milled into powder for filler use in the composite polymer electrolyte membrane.

#### Preparation of the composite polymer electrolyte membrane

PEO (Mw ~600,000) and Lithium bis(trifluoromethanesulfonyl)imide (LiTFSI) were first dissolved in acetonitrile at 60 °C with an EO/Li mole ratio of 10. LSTZ powder was then added into the PEO/LiTFSI solution for stirring with a LSTZ weight percentage of 10, 20, 30, 50 wt.%. The PEO/LiTFSI/LSTZ suspension was mixed over-night before being poured in a polytetrafluoroethylene dish, dried in a vacuum oven at 50 °C for 24 h to obtain the PEO/LSTZ membrane. The membranes were transferred to glove box and stored for use.

#### Symmetric Li|PEO/LSTZ|Li cell assembly

A PEO/LSTZ membrane was sandwiched between two identical lithium discs; the Li|PEO/LSTZ|Li was pressed and sealed in a 2032 coin cell for testing. The plating/stripping curves were collected with a Land CT2001A battery-test system.

#### Solid-state Li|PEO/LSTZ|LiFePO<sub>4</sub> and Li|PEO/LSTZ|LiNi<sub>0.8</sub>Mn<sub>0.1</sub>Co<sub>0.1</sub>O<sub>2</sub> batteries

Solid-state batteries were assembled with a Li anode, a PEO/LSTZ electrolyte membrane, and a LiFePO<sub>4</sub> (LFP) or LiNi<sub>0.8</sub>Mn<sub>0.1</sub>Co<sub>0.1</sub>O<sub>2</sub> (NMC) cathode in an Ar-filled glove box. The stacked electrolytes and electrodes were then pressed to ensure a close contact before sealing in a coin cell. The LFP cathode was prepared by mixing LFP powder, carbon black, and PEO/LiTFSI in a weight ratio of 60:10:30 in acetonitrile. The obtained viscous slurry was then coated on a carbon-coated Al foil, and dried at 50 °C overnight in vacuum to produce finally the cathode with an LFP mass loading of 3.5 mg cm<sup>-2</sup>. For the preparation of the high-voltage cathode, NMC powder, carbon black, and PVDF/LiTFSI were mixed in a weight ratio of 80:10:10 in dimethylformamide solvent.

#### Electrochemical measurements

An Li-blocking electrode was prepared by sputtering Au on the LSTZ pellet surface for the Li-ion conductivity measurement of the sintered LSTZ pellet. For the PEO/LSTZ membrane, the ionic conductivity was tested via a symmetric SS|PEO/LSTZ|SS (SS = stainless steel) cell and evaluated during the temperatures from 25 to 80 °C. The conductivity was calculated based on the surface area and the thickness of the pellet or the composite membrane. The Li-ion transference number ( $t_{\text{Li}^+}$ ) of PEO/LSTZ was measured in a symmetric Li cell with a DC polarization of 10 mV. The lithium ion transference number ( $t_{\text{Li}^+}$ ) was calculated with the equation:

$$t_{\text{Li}^+} = \frac{I_s(\Delta V - I_0 R_0)}{I_0(\Delta V - I_s R_s)}$$

where the  $I_0$  and  $I_s$  are the initial and steady-state currents,  $\Delta V$  is the potential applied across the cell.  $R_0$  and  $R_s$  represent the charge-transfer resistance before and after the polarization of the symmetric cell, respectively.

Linear sweep voltammetry was conducted with Li|PEO/LSTZ|SS coin cells at 45 °C. EIS measurements were conducted on an Auto Lab workstation with an AC amplitude of 10 mV and a frequency range from 1 MHz to 0.1 Hz. Galvanostatic charge/discharge of the solid-state batteries were performed at different current densities at 45 °C on a Land CT2001A battery-test system.

### Materials characterization

The crystalline phases of the LSTZ pellet, PEO/LiTFSI, and PEO/LSTZ membranes were investigated by X-ray diffraction (XRD) analysis with a Rigaku MiniFlex 600 instrument. The morphology of the PEO-LSTZ membrane was characterized by SEM (FEI Quanta 650) coupled with an energy-dispersive microscopy EDX spectrometer. XPS measurements were performed to analyze the surface chemical states of the pristine and cycled PEO/LSTZ membrane on an Axis Ultra DLD spectrometer (Kratos). A Time-of-flight secondary ion mass spectroscopy (TOF-SIMS) instrument (IONTOF GmbH, Germany 2010) was used to collect the depth profiling and chemical analysis data of the PEO/LSTZ membrane. All the data were recorded under ultra-high vacuum at a pressure of  $10^{-9}$  Torr. The detected secondary ions possessed a mass resolution of  $> 5,000$  in a negative model. During depth profiling, a 500 eV  $\text{Cs}^+$  (negative) ion beam was raster scanned typically over the cycled electrodes. A 20 ns pulsed  $\text{Bi}^+$  ion beam (30 keV ion energy, 3.8 pA measured current) set in a high current mode was employed for depth profiling or high lateral resolution mapping ( $< 200$  nm) analysis. All the pristine and cycles PEO-LSTZ samples tested for XPS and TOF-SIMS analysis were transferred in a home-made air-free capsule (U.S. Pattern Application Serial No. 14/445650) between the glovebox and equipment.

All solid-state magic-angle spinning (MAS)  ${}^6\text{Li}$  NMR characterizations are performed with a 2.5-mm HXY Bruker probe under a spinning rate of 25 kHz. The operating Larmor frequencies of  ${}^6\text{Li}$  and  ${}^7\text{Li}$  are 73.6 MHz and 194.4 MHz, respectively. Both  ${}^6\text{Li}$  and  ${}^7\text{Li}$  NMR spectra were acquired with a single-pulse sequence. For  ${}^7\text{Li}$  NMR, a solid  $90^\circ$  pulse length of 3.35  $\mu\text{s}$  and a recycle delay of 2 s was used. For  ${}^6\text{Li}$  NMR, the solid  $90^\circ$  pulse length was 4.75  $\mu\text{s}$  and the recycle delay was 20 s.  ${}^6\text{Li}$  NMR chemical shift was calibrated with an external reference of  $\text{LiCl}_{(\text{s})}$  at  $-1.1$  ppm.

### DFT Computation Details

DFT calculations were performed with the Vienna Ab-initio Simulation Package (VASP) (1, 2) having a PAW pseudopotential (3), Perdew-Burke-Ernzerhof (PBE) exchange-correlation functional (4), and a kinetic energy cutoff of 400 eV for the plane-wave expansion. The perovskite (001) surface is modelled by a slab, as shown in Fig. S5. We used the  $3 \times 3 \times 1$  Monkhorst Pack k-points (5), and a vacuum layer of  $\sim 15$  Å perpendicular to the slab. All atomic positions were fully relaxed until the final force on each atom was less than 0.01 eV/Å.

The adsorption energies of the LiTFSI and Li in LiTFSI were calculated as

$$E_{\text{ads}}(\text{LiTFSI}) = E(\text{sub}) + E(\text{LiTFSI}) - E(\text{sub} + \text{LiTFSI}) \quad (1)$$

$$E_{\text{ads}}(\text{Li}) = E(\text{sub} + \text{TFSI}) + E(\text{Li}_{\text{atom}}) - E(\text{sub} + \text{LiTFSI}) \quad (2)$$

$$E_{\text{ads}}(\text{Li}) = E(\text{TFSI}) + E(\text{Li}_{\text{atom}}) - E(\text{LiTFSI}) \quad (3)$$

where  $E(\text{sub} + \text{LiTFSI})$  and  $E(\text{sub})$  are total energies of the perovskite (001) surfaces with and without LiTFSI, respectively.  $E(\text{sub} + \text{TFSI})$  are total energies of the perovskite (001) with TFSI.  $E(\text{Li}_{\text{atom}})$  is the reference energy of Li atom, which can be chosen as the energy of bulk metal (this reference energy is canceled when comparing the adsorption energy).

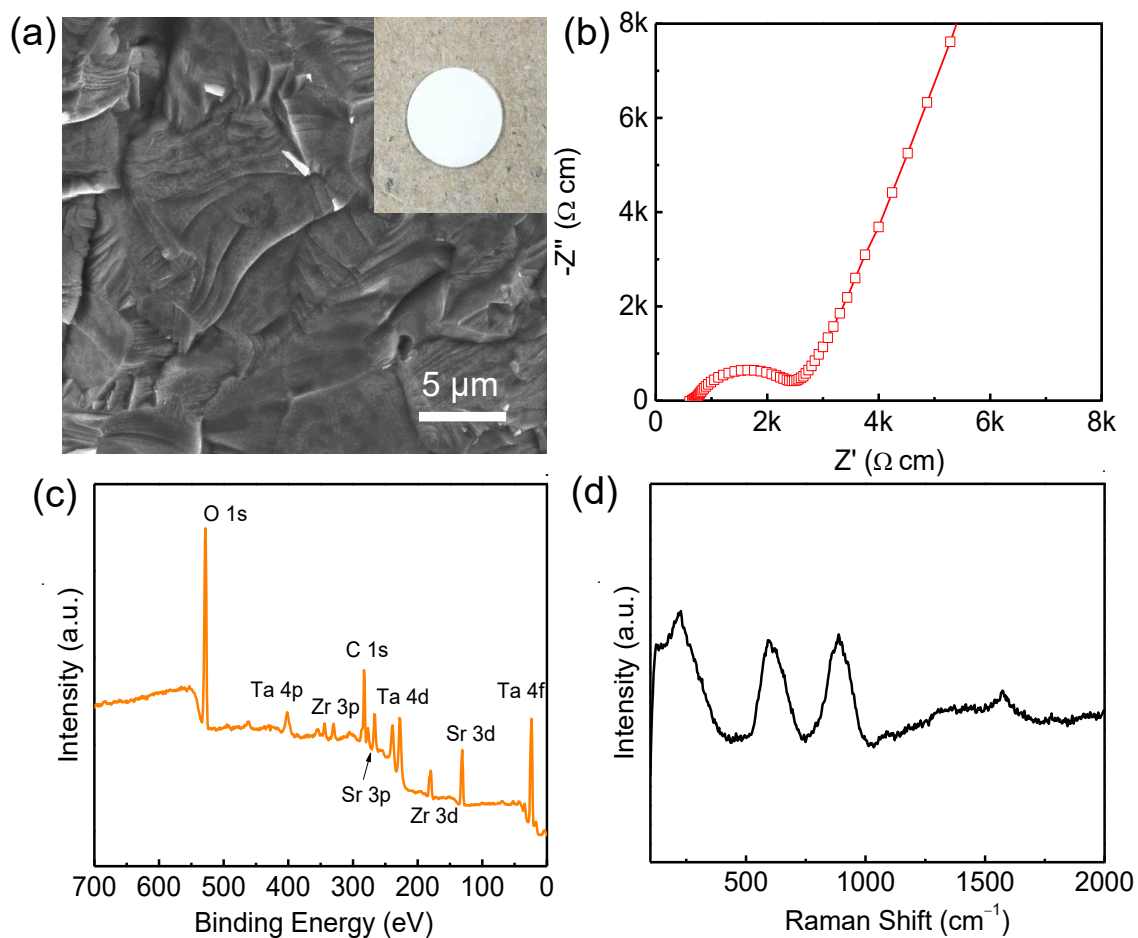

**Fig. S1.** (a) SEM image, (b) electrochemical impedance plot, (c) XPS survey spectrum, and (d) Raman spectrum of the LSTZ pellet. The EIS data in (b) is fitted with an equivalent circuit ( $R_{\text{bulk}}//(\text{R}_{\text{gb}}\text{CPE})//\text{CPE}$ ).

The pellet was very dense, and almost no grain boundaries were seen from Fig. S1a. The transcrystalline rupture showed very strong bonding between the grains. As a result, the  $\text{Li}^+$  could transport rapidly without barriers of the grain boundaries. LSTZ has a high bulk  $\text{Li}^+$  conductivity of  $1.2 \times 10^{-3} \text{ S cm}^{-1}$  at room temperature (Fig. S1b). An XPS survey spectrum (Fig. S1c) reveals the presence of only Sr, Ta, Zr, and O elements in the LSTZ powder. Owing to the stability of LSTZ in moist air, there is no detected Li-insulating  $\text{Li}_2\text{CO}_3$  on the surface of LSTZ (Figure S1d).

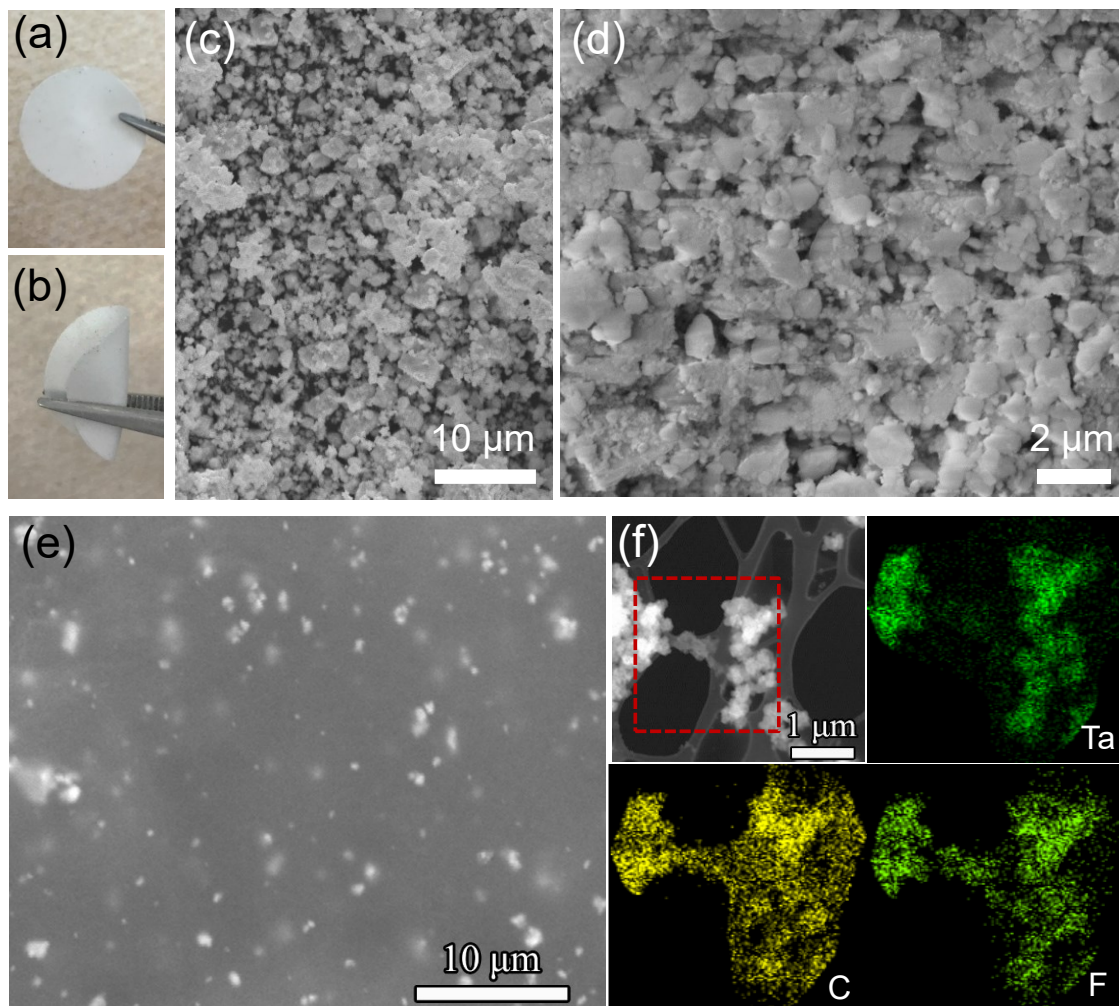

**Fig. S2.** (a, b) digital images of the as-prepared the PEO/LSTZ membrane. (c, d) SEM images of the ball-milled LSTZ powders. (e) SEM image of the PEO/LSTZ membrane. (f) Elemental mapping of Ta, C, and F in PEO/LSTZ acquired by a transmission electron microscope.

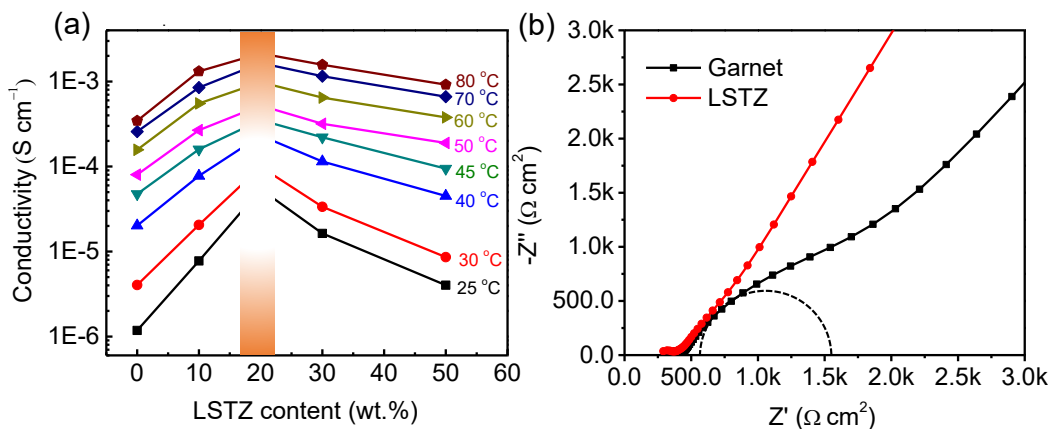

**Fig. S3.** (a) Ionic conductivity of PEO/LSTZ membranes with various LSTZ weight percentages of 0, 10, 20, 30, 50 wt% at different temperatures. (b) Comparative impedance of ss|PEO/LiTFSI|garnet|PEO/LiTFSI|ss cell and ss|PEO/LiTFSI|LSTZ|PEO/LiTFSI|ss.

Fig. S3b shows the interfacial impedance between PEO/LiTFSI membrane and LSTZ is only 75 Ω cm<sup>2</sup>, much lower than that of garnet (~ 600 Ω cm<sup>2</sup>). Although LSTZ and garnet have a similar high bulk conductivity, it is much easier for Li ions to transport from LSTZ to PEO/LiTFSI than from garnet to PEO/LiTFSI.

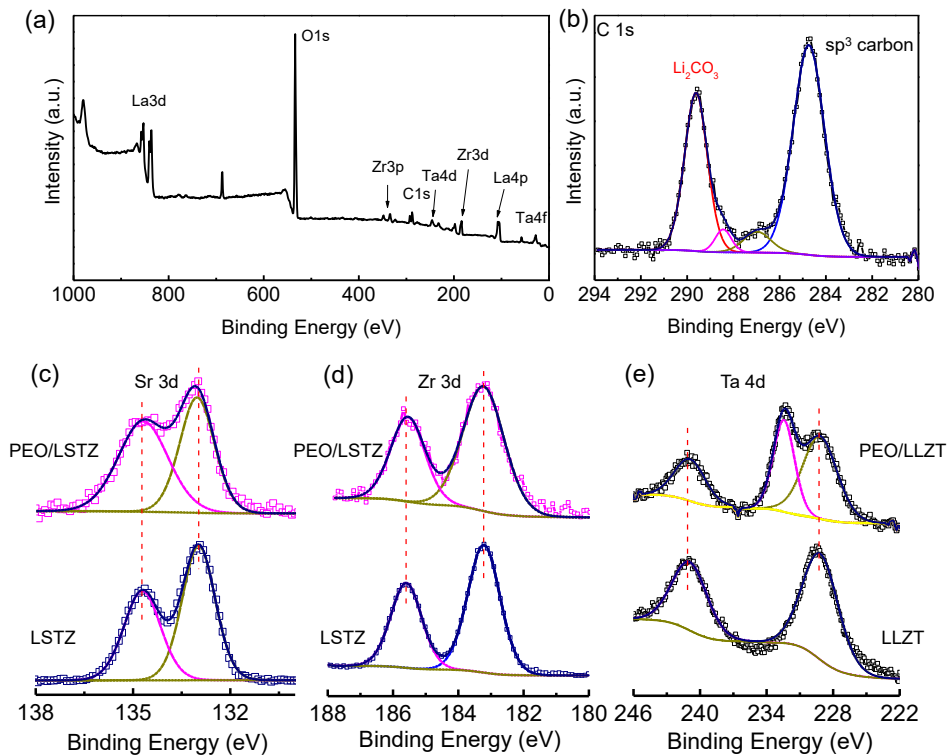

**Fig. S4.** (a) Survey and (b) C 1s high-resolution XPS spectra of Ta-doped  $\text{Li}_{6.5}\text{La}_3\text{Zr}_{1.5}\text{Ta}_{0.5}\text{O}_{12}$  (LLZT), which show that  $\text{Li}_2\text{CO}_3$  was coated on the surface of LLZT. High-resolution XPS spectra of (c) Sr 3d and (d) Zr 3d for LSTZ and PEO/LSTZ composite; neither the Sr nor Zr shows any obvious binder energy shift. (e) High-resolution Ta 4d XPS spectra of LLZT and PEO/LLZT composite.

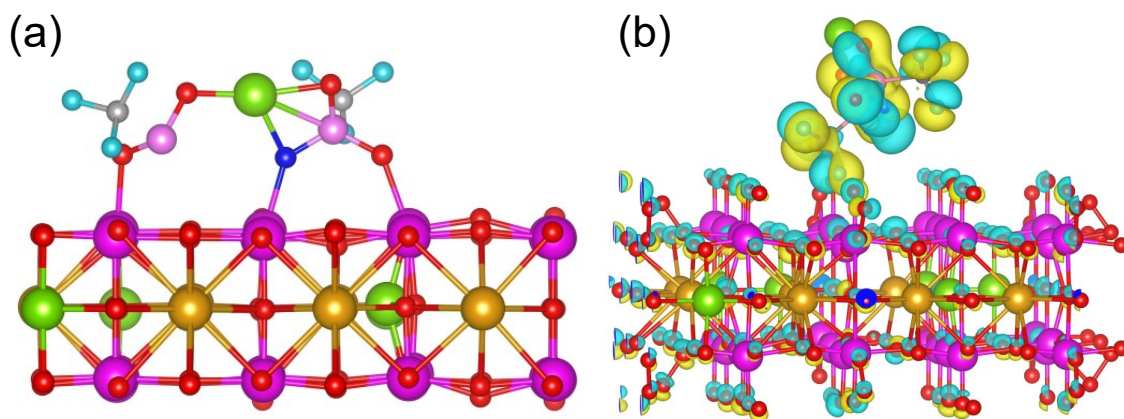

**Fig. S5.** (a) The crystallographic structure of LiTFSI adsorbed on the surface of Ta-terminated perovskite (001). (b) Differential charge density of the adsorbed LiTFSI on the O-terminated (001) surface of the perovskite LSTZ with one oxygen vacancy. Olive and blue colors represent increase and decrease of electronic distribution density, respectively. The isovalue is 0.034 e/Bohr<sup>3</sup>.

Ta-terminated perovskite (001) surface (Fig. S5a) was first considered as a stable substrate to adsorb the LiTFSI, but it would decompose TFSI and then become O terminated. Therefore, O-terminated perovskite (001) was deemed as a stable and favorable substrate.



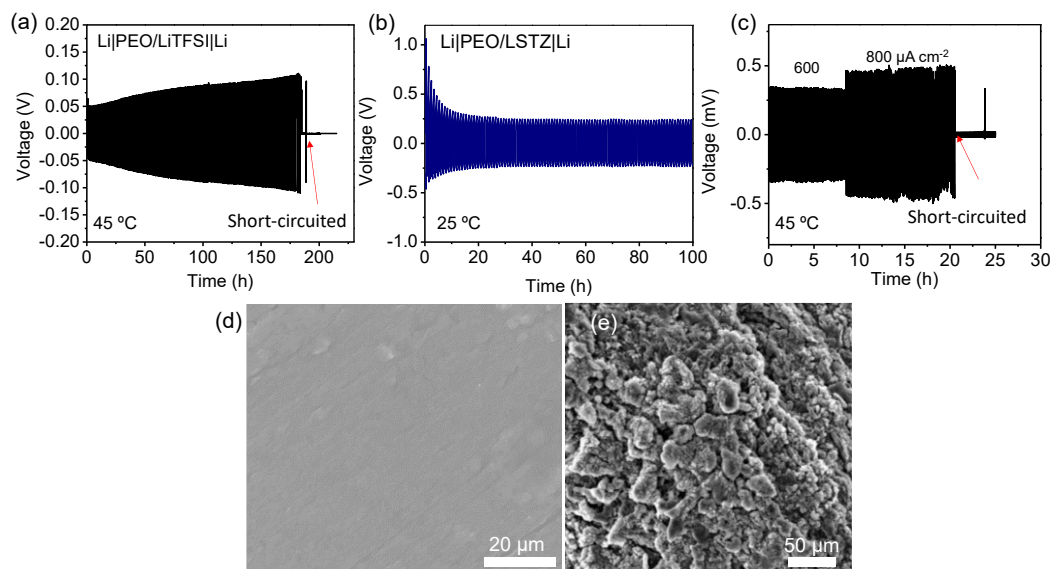

**Fig. S6.** (a) Voltage-time profile of Li|PEO/LiTFSI|Li symmetric cell cycled at  $100 \mu\text{A cm}^{-2}$  and  $45 \text{ }^\circ\text{C}$ . Voltage-time profile of a Li|PEO/LSTZ|Li symmetric cell cycled at (b)  $25 \text{ }^\circ\text{C}$  ( $100 \mu\text{A cm}^{-2}$ ) and (c)  $45 \text{ }^\circ\text{C}$  ( $600$  and  $800 \mu\text{A cm}^{-2}$ ). SEM image of (d) a pristine lithium surface and (e) a Li surface collected from the Li|PEO/LiTFSI|Li symmetric cell after cycling at  $100 \mu\text{A cm}^{-2}$  at  $45 \text{ }^\circ\text{C}$ .

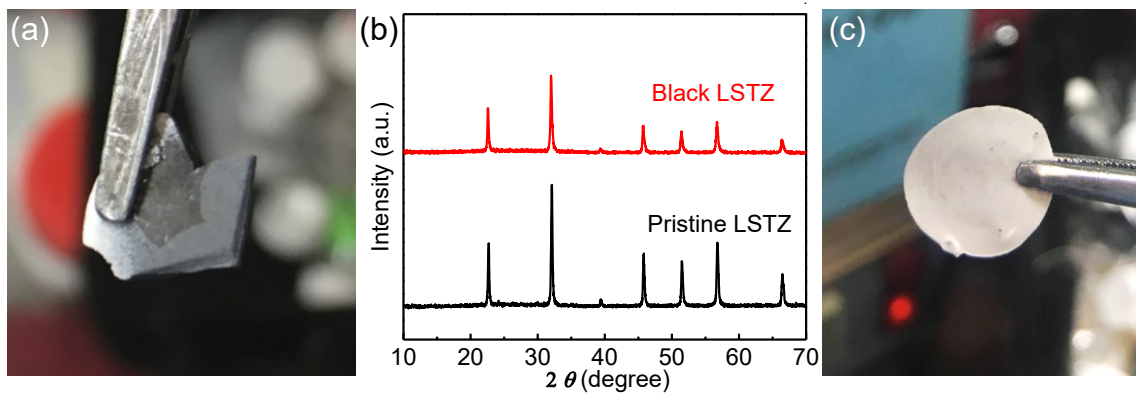

**Fig. S7.** (a) LSTZ pellet after contacting with Li metal. (b) Comparative XRD patterns of pristine LSTZ and black LSTZ pellets. (c) PEO/LSTZ membrane retrieved from cycled symmetric lithium cell.

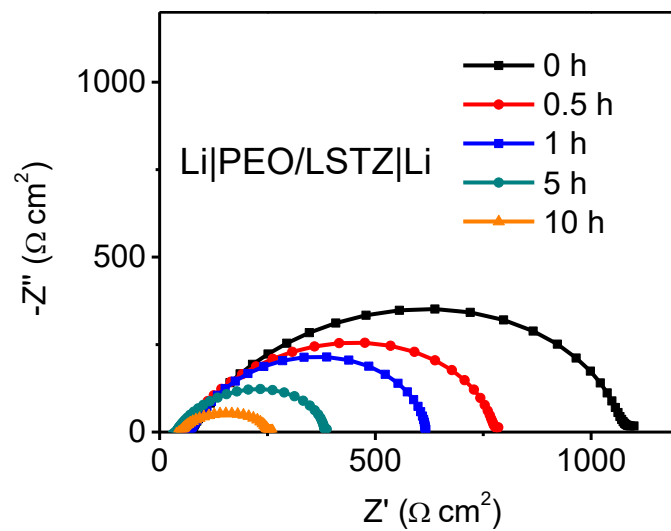

**Fig. S8.** A time-resolved EIS spectra of the Li|PEO/LSTZ|Li symmetric cell measured at OCV without cycling at 45 °C.

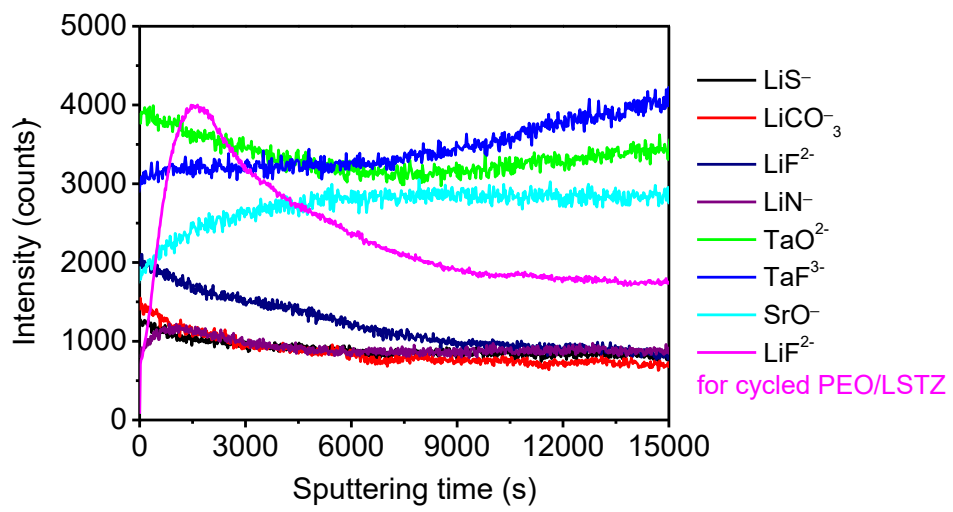

**Fig. S9.** Depth profile of the pristine PEO/LSTZ membrane; the  $\text{LiF}^{2-}$  signal (pink curve) from the cycled PEO/LSTZ was put here for comparison

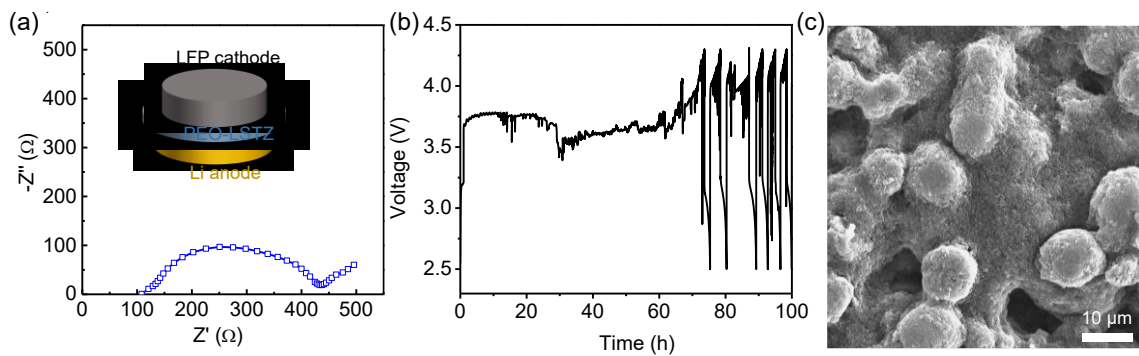

**Fig. S10.** (a) EIS of the solid-state LFP|PEO/LSTZ|Li cell tested at 45 °C. (b) Voltage-time profile of NMC|PEO/LSTZ|Li solid-state batteries with PEO as the binder in the NMC cathode. (c) SEM image of the NMC cathode. NMC particles were uniformly covered by a PVDF binder. The PVDF can isolate the NMC particles and PEO/LSTZ electrolyte membrane, and thus prevent the PEO from being decomposed by the high-voltage NMC cathode.

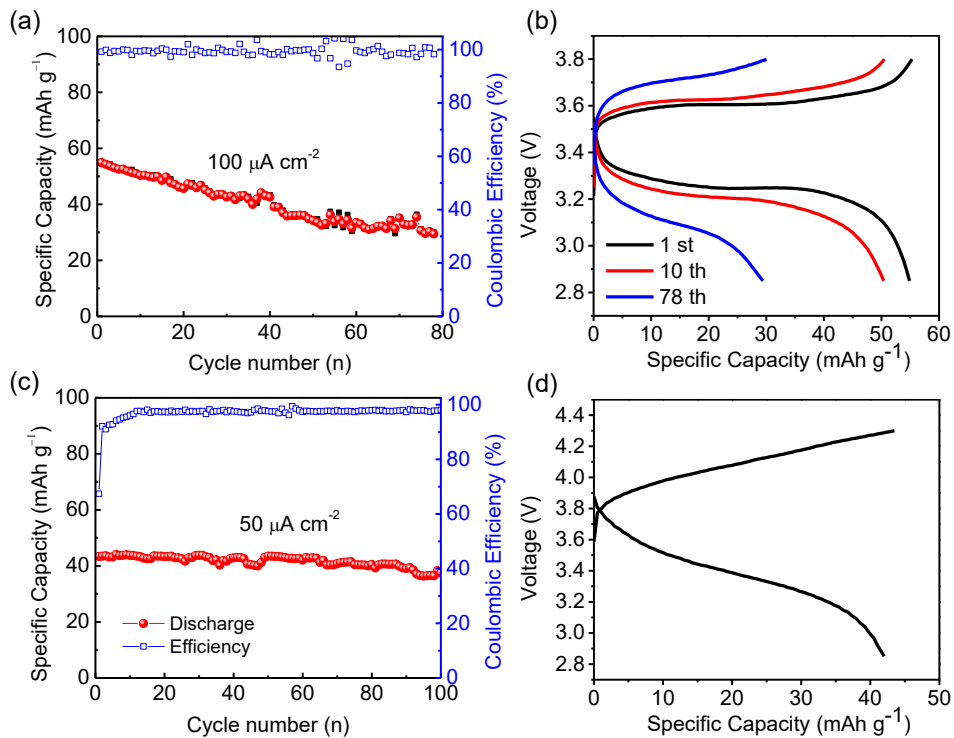

**Fig. S11.** Cycling performances and charge-discharge curves of (a, b) LFP|PEO/LSTZ|Li and (c, d) NMC|PEO/LSTZ|Li all-solid-state batteries measured at 25 °C.

## References

1. Kresse G Hafner J (1993) Ab initio molecular dynamics for liquid metals. *Physical Review B* 47(1):558-561.
2. Kresse G Furthmüller J (1996) Efficient iterative schemes for ab initio total-energy calculations using a plane-wave basis set. *Physical Review B* 54(16):11169-11186.
3. Kresse G Joubert D (1999) From ultrasoft pseudopotentials to the projector augmented-wave method. *Physical Review B* 59(3):1758-1775.
4. Perdew JP, Burke K, Ernzerhof M (1996) Generalized Gradient Approximation Made Simple. *Physical Review Letters* 77(18):3865-3868.
5. Monkhorst HJ Pack JD (1976) Special points for Brillouin-zone integrations. *Physical Review B* 13(12):5188-5192.
